# Supplementary material for: Design of surface termination for high-performance perovskite solar cells
Source: Royal Society of Chemistry journal article supplement (doi:10.1039/d1ta06067h), 2021-01-01
Supplement: d1ta06067h1.pdf [file d1ta06067h1.pdf]

## **Design of Surface Termination for High-Performance Perovskite Solar Cells**

Yan Yang, Wangen Zhao,\* Tengteng Yang, Jiali Liu, Jingru Zhang, Yuankun Fang,  
Shengzhong (Frank) Liu\*

Y. Yang, Prof. W. Zhao, T. Yang, J. Liu, J. Zhang, Y. Fang, Prof. S. Liu

Key Laboratory for Applied Surface and Colloid Chemistry, National Ministry of  
Education; Shaanxi Engineering Lab for Advanced Energy Technology; School of  
Materials Science and Engineering, Shaanxi Normal University, Xi'an 710062,  
China.

Email: [wgzhao@snnu.edu.cn](mailto:wgzhao@snnu.edu.cn); [szliu@dicp.ac.cn](mailto:szliu@dicp.ac.cn)

Prof. S. Liu

Dalian National Laboratory for Clean Energy, iChEM (Collaborative Innovation  
Center of Chemistry for Energy Materials); Dalian Institute of Chemical Physics,  
Chinese Academy of Sciences, Dalian, 116023, China.

Email: [szliu@dicp.ac.cn](mailto:szliu@dicp.ac.cn)

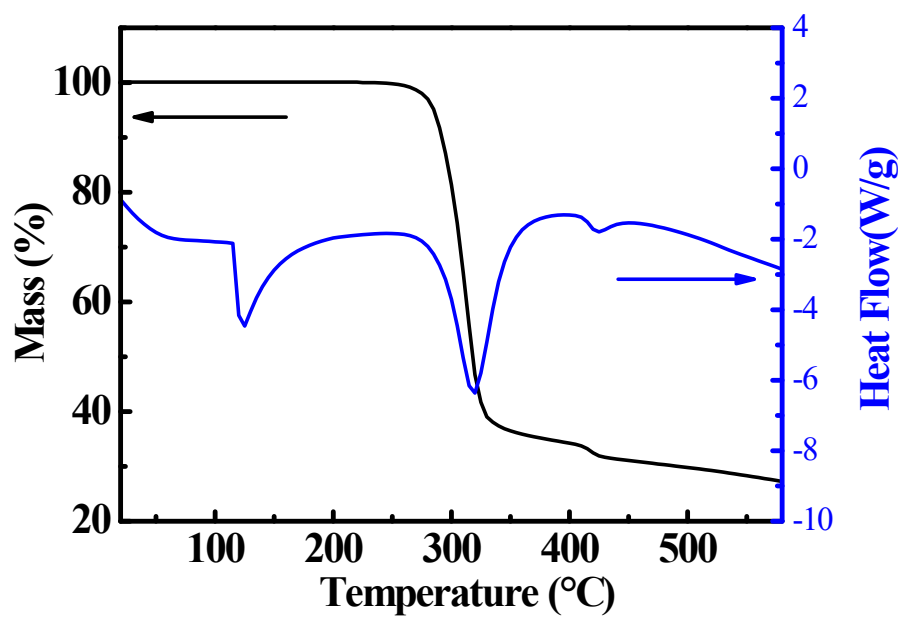

**Fig. 1.** Thermogravimetric analysis (TGA) of GASCN.

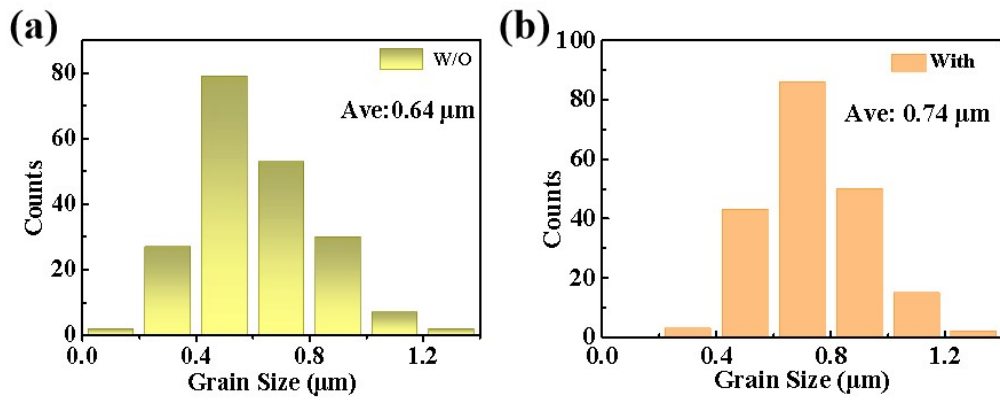

**Fig. 2.** Corresponding statistical size distributions for the MAPbI<sub>3</sub> films with GASCN contents, respectively. All films were deposited on glass/FTO/c-TiO<sub>2</sub> substrates.

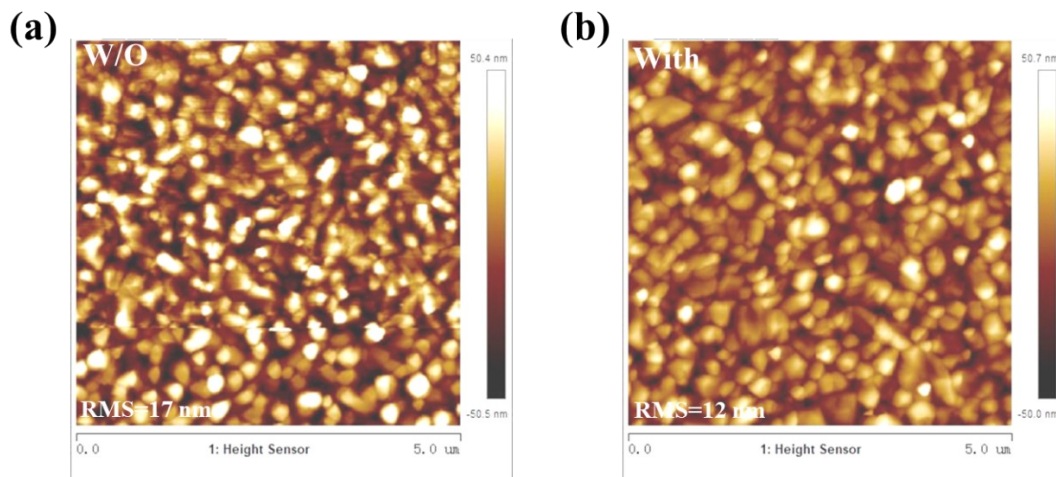

**Fig. 3.** Atomic force microscopy (AFM) images of the pristine and 0.05mg/ml GASCN treated film. The region of the AFM images is  $5 \times 5 \mu\text{m}$ .

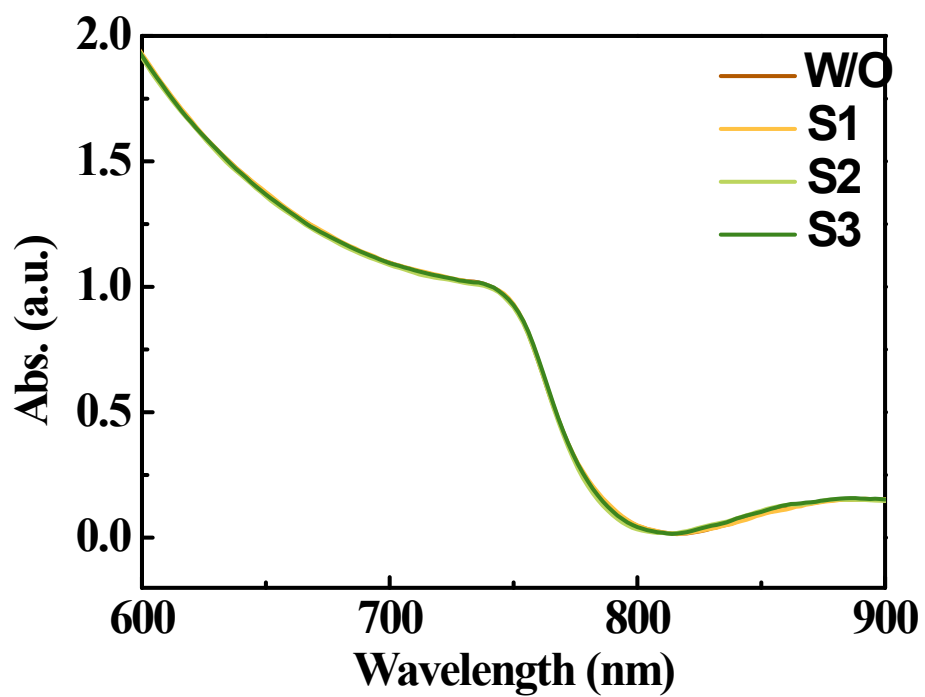

**Fig. 4.** UV-vis absorbance spectrum of the perovskite films with the different amounts of GASCN modification.

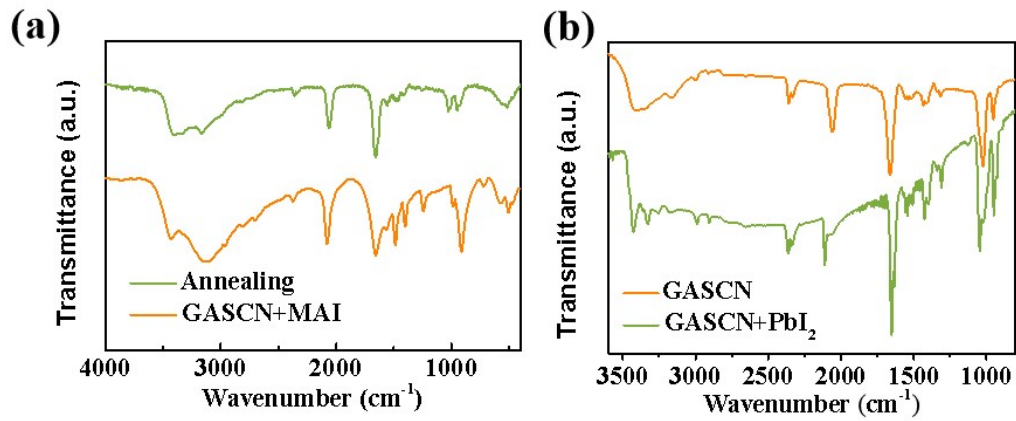

**Fig. 5.** Fourier transform infrared (FTIR) spectra of (a) GASCN and MAI before and after annealing and (b) GASCN with and without PbI<sub>2</sub> in DMSO solutions.

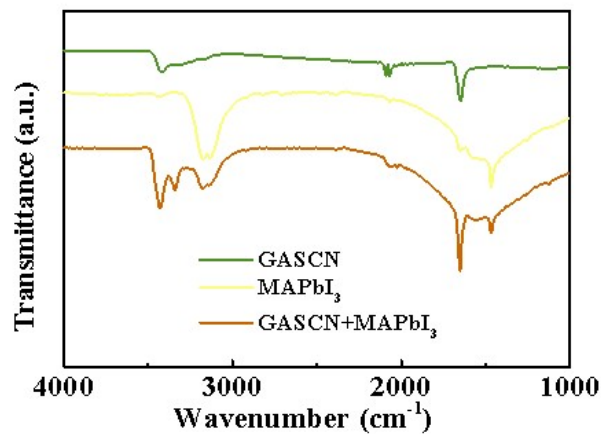

**Fig. 6.** Fourier transform infrared (FTIR) spectra of different films. All films were deposited on glass/FTO/c-TiO<sub>2</sub> substrates.

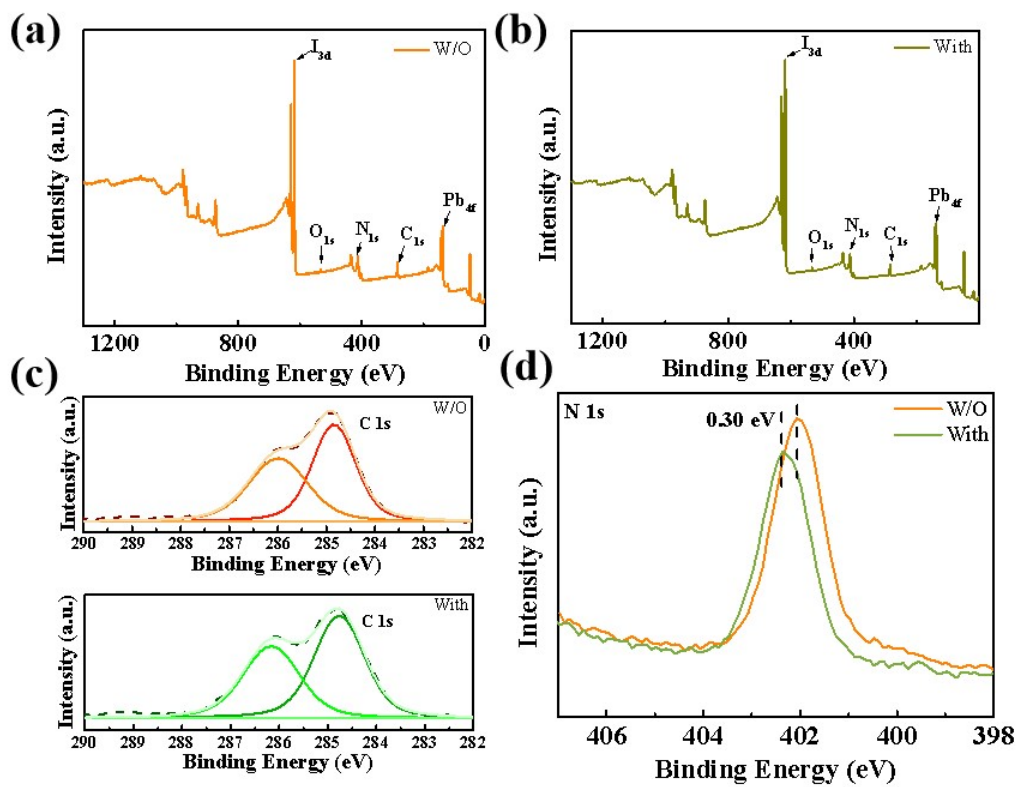

**Fig. 6.** XPS spectra of (a) pristine film and (b) GASCN treated film, and high resolution XPS of C 1s (c) and (d) N 1s of pristine and GASCN-MAPbI<sub>3</sub> films.

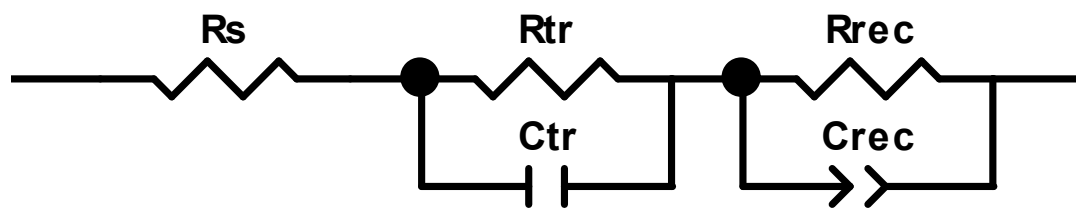

**Fig. 7.** Equivalent circuit model for the EIS spectra at bias voltage of 1.0 V.  $R_s$ ,  $R_{tr}$ ,  $R_{rec}$  and  $C_{rec}$  are series resistance, transport resistance, recombination resistance and the chemical capacitance, respectively.



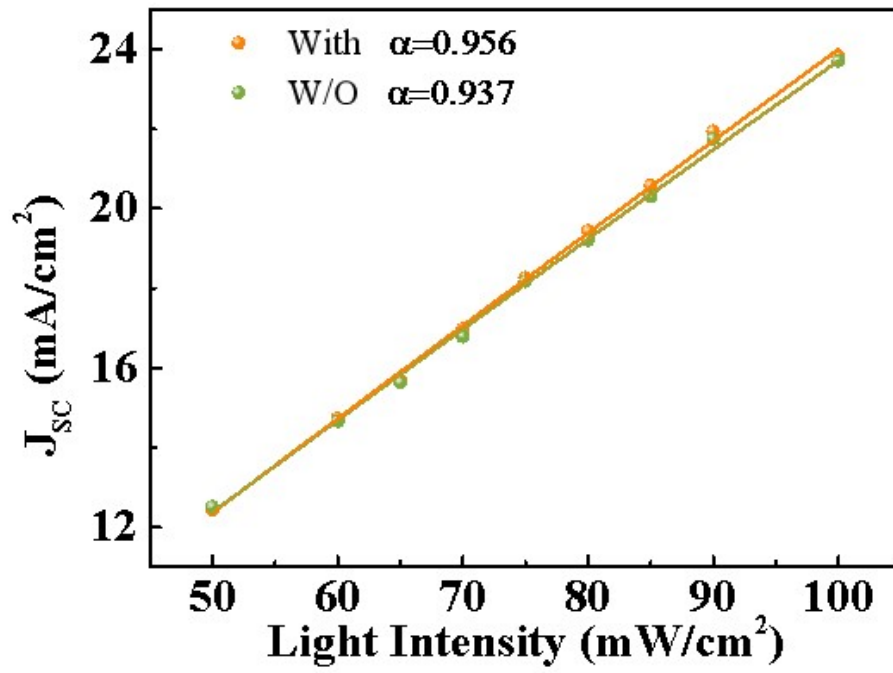

**Fig. 8.** The  $J_{sc}$  as a function of the light intensity for the corresponding devices.

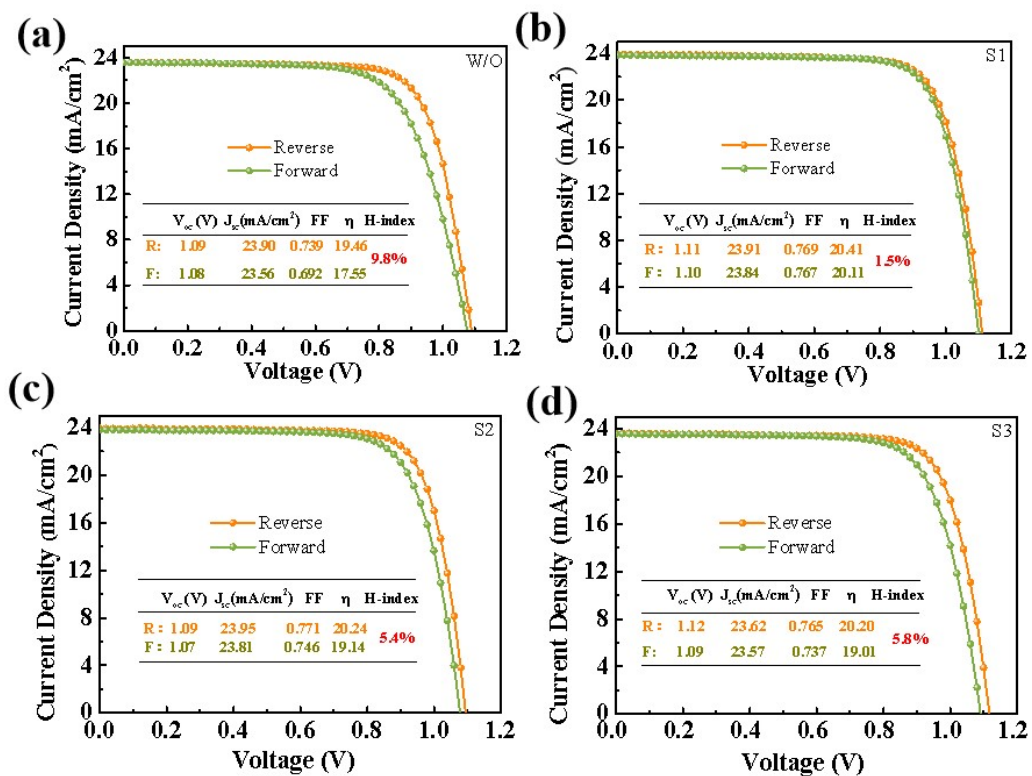

**Fig. 9.** The  $J$ - $V$  curves of MAPbI<sub>3</sub> perovskite cells without and with GASCN treatment are recorded with forward and reverse voltage scanning directions under AM 1.5G irradiation (100 mW cm<sup>-2</sup>).

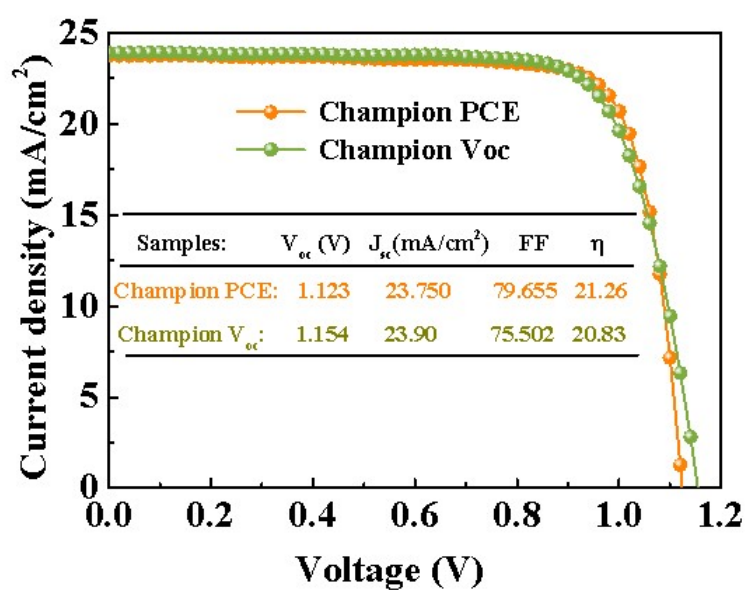

**Fig. 11.**  $J$ - $V$  curve of device with the champion  $V_{OC}$  and champion PCE measured by reverse scan under standard AM 1.5G irradiation.

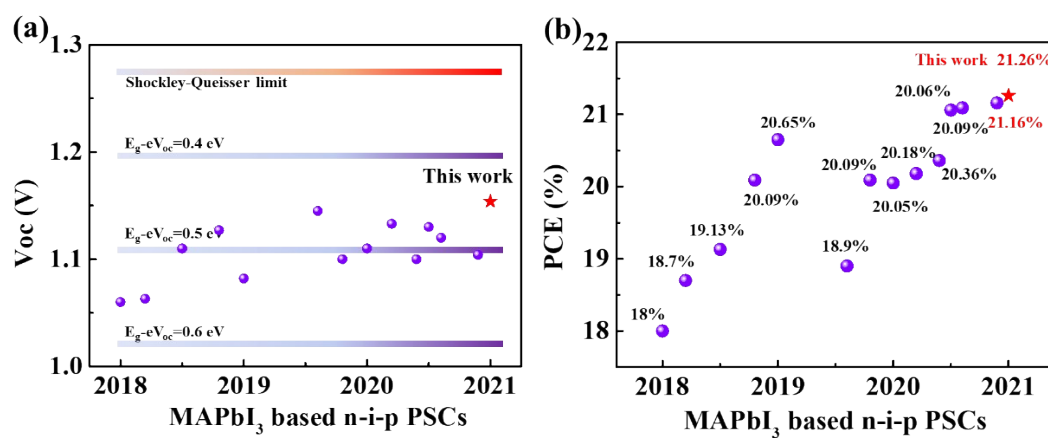

**Fig. S12** Photovoltaic parameters statistics of MAPbI<sub>3</sub> based n-i-p PCSs in recent three years.

**Table 1.** Photovoltaic parameters for typical MAPbI<sub>3</sub> devices based on different solvent of GASCN with reverse scanning directions. All  $J$ - $V$  curves were measured under simulated AM 1.5G illumination with a reverse scan rate of 0.15 V s<sup>-1</sup>.

| Sample | $V_{oc}$ (V)           | $J_{sc}$ (mA/cm <sup>2</sup> ) | Fill Factor (%)       | PCE (%)               |
|--------|------------------------|--------------------------------|-----------------------|-----------------------|
| CH     | 1.112<br>(1.103±0.007) | 23.99<br>(23.69±0.18)          | 76.54<br>(74.92±1.46) | 20.23<br>(19.58±0.48) |
| CB     | 1.154<br>(1.133±0.014) | 23.95<br>(23.81±0.11)          | 79.65<br>(77.76±1.14) | 21.26<br>(20.98±0.14) |
| EA     | 1.129<br>(1.100±0.018) | 23.98<br>(23.76±0.17)          | 75.95<br>(74.01±1.29) | 20.23<br>(19.35±0.58) |
| IPA    | 1.113<br>(1.083±0.012) | 23.99<br>(23.67±0.16)          | 74.71<br>(72.63±1.40) | 19.38<br>(18.61±0.41) |

**Table 2.** Fitted parameters based on TR-PL spectra of the perovskite films.

| Sample | $\tau_1$ (ns) | % of $\tau_1$ | $\tau_2$ (ns) | % of $\tau_2$ | $\tau_{ave}$ (ns) |
|--------|---------------|---------------|---------------|---------------|-------------------|
| W/O    | 22.095        | 37.20         | 12.808        | 62.80         | 22.095            |
| S1     | 71.545        | 51.02         | 33.668        | 48.98         | 52.992            |
| S2     | 65.687        | 57.86         | 27.374        | 42.14         | 49.540            |
| S3     | 55.261        | 51.20         | 20.975        | 48.80         | 38.529            |

**Table 3.** Equivalent circuit fitting parameters for the EIS spectra.

| Sample | $R_s$ ( $\Omega$ ) | $R_{tr}$ ( $\Omega$ ) | $C_{tr}$ (nF) | $R_{rec}$ ( $\Omega$ ) | $C_{rec}$ (nF) |
|--------|--------------------|-----------------------|---------------|------------------------|----------------|
| W/O    | 33.85              | 124                   | 38.46         | 3130                   | 12.18          |
| With   | 33.36              | 385                   | 71.08         | 7885                   | 23.45          |

**Table 4.** Literature survey of recent works on polycrystalline MAPbI<sub>3</sub>-based n-i-p PSCs.

| Device Structure                                                    | $J_{sc}$<br>(mA/cm <sup>2</sup> ) | $V_{oc}$ (V)             | FF<br>(%) | PCE(%) | Ref.         |
|---------------------------------------------------------------------|-----------------------------------|--------------------------|-----------|--------|--------------|
| SnO <sub>2</sub> /MAPbI <sub>3</sub> /FAI/HTL                       | 22.99                             | 1.127                    | 77.50     | 20.09  | 1            |
| c-TiO <sub>2</sub> /m-TiO <sub>2</sub> /MAPbI <sub>3</sub> /AVA/HTL | 22.30                             | 1.060                    | 76.00     | 18.00  | 2            |
| SnO <sub>2</sub> /MAPbI <sub>3</sub> /EDBEPbI <sub>4</sub> /HTL     | 23.17                             | 1.110                    | 73.90     | 19.13  | 3            |
| SnO <sub>2</sub> /MAPbI <sub>3</sub> /QA/HTL                        | 23.19                             | 1.130                    | 80.00     | 21.06  | 4            |
| c-SnO <sub>2</sub> /MAPbI <sub>3</sub> /HTL                         | 23.98                             | 1.120                    | 78.62     | 21.09  | 5            |
| c-SnO <sub>2</sub> /MAPbI <sub>3</sub> /HTL                         | 23.73                             | 1.100                    | 78.00     | 20.36  | 6            |
| Li-SnO <sub>2</sub> /MAPbI <sub>3</sub> /HTL                        | 23.24                             | 1.133                    | 76.66     | 20.18  | 7            |
| c-TiO <sub>2</sub> /SnO <sub>2</sub> /MAPbI <sub>3</sub> /HTL       | 23.39                             | 1.104                    | 81.90     | 21.16  | 8            |
| c-TiO <sub>2</sub> /SnO <sub>2</sub> /MAPbI <sub>3</sub> /HTL       | 22.92                             | 1.110                    | 79.00     | 20.05  | 9            |
| c-TiO <sub>2</sub> /MAPbI <sub>3-x</sub> Cl <sub>x</sub> /HTL       | 21.91                             | 1.063                    | 80.00     | 18.70  | 10           |
| SnO <sub>2</sub> /Chol-SnO <sub>2</sub> /MAPbI <sub>3</sub> /HTL    | 22.80                             | 1.145                    | 72.41     | 18.90  | 11           |
| c-TiO <sub>2</sub> /MAPbI <sub>3</sub> /HTL                         | 23.89                             | 1.100                    | 76.40     | 20.09  | 12           |
| c-TiO <sub>2</sub> /SnO <sub>2</sub> /MAPbI <sub>3</sub> /HTL       | 23.31                             | 1.082                    | 82.25     | 20.65  | 13           |
| TiO <sub>2</sub> /MAPbI <sub>3</sub> /HTL                           | 23.75                             | 1.123<br>1.154 (highest) | 79.66     | 21.26  | This<br>work |

Respectively, all HTL in the table refer to Spiro-OMeTAD.

## References:

- 1 Y. Zou, H.-Y. Wang, Y. Qin, C. Mu, Q. Li, D. Xu and J. Zhang, *Adv. Funct. Mater.*, 2019, **29**, 1805810.
- 2 T. Ye, A. Bruno, G. Han, T. M. Koh, J. Li, N. F. Jamaludin, C. Soci, S. G. Mhaisalkar and W. L. Leong, *Adv. Funct. Mater.*, 2018, **28**, 1801654.
- 3 P. Li, Y. Zhang, C. Liang, G. Xing, X. Liu, F. Li, X. Liu, X. Hu, G. Shao and Y. Song, *Adv. Mater.*, 2018, **30**, e1805323.
- 4 Q. He, M. Worku, H. Liu, E. Lochner, A. J. Robb, S. Lteif, J. S. R. Vellore-Winfred, K. Hanson, J. B. Schlenoff, B. J. Kim and B. Ma, *Angew. Chem. Int. Ed.*, 2021, **60**, 2485-2492.
- 5 Z. Liu, F. Cao, M. Wang, M. Wang and L. Li, *Angew. Chem. Int. Ed.*, 2020, **59**, 4161-4167.
- 6 W. Hou, G. Han, T. Ou, Y. Xiao and Q. Chen, *Angew. Chem. Int. Ed.*, 2020, **59**, 21409-21413.
- 7 K. Jung, W.-S. Chae, J. W. Choi, K. C. Kim and M.-J. Lee, *J. Energy Chem.*, 2020, **59**, 755-762.
- 8 X. Wang, Y. Wang, T. Zhang, X. Liu and Y. Zhao, *Angew. Chem. Int. Ed.*, 2020, **59**, 1469-1473.
- 9 N. Wei, Y. Chen, Y. Miao, T. Zhang, X. Wang, H. Wei and Y. Zhao, *J. Phys. Chem. Lett.*, 2020, **11**, 8170-8176.
- 10 F. Wu, X. Yue, Q. Song and L. Zhu, *Sol. RRL.*, 2018, **2**, 1700147.
- 11 J. Yan, Z. Lin, Q. Cai, X. Wen and C. Mu, *ACS Appl. Energy Mater.*, 2020, **3**, 3504-3511.

12 Z. Yao, W. Zhao, Z. Xu, J. Wen and S. Liu, *Small*, 2020, **16**, e2003582.

13 Y. Wang, H. Zhang, T. Zhang, W. Shi, M. Kan, J. Chen and Y. Zhao, *Sol. RRL.*,  
2019, **3**, 1900197.
